# Supplementary material
Source: PubMed Central journal article supplement (PMC3212626)
Supplement: NIHMS328642-supplement-1_si_001.pdf [file NIHMS328642-supplement-1_si_001.pdf]

# An Active Site Guanine Participates in *glmS* Ribozyme Catalysis in its Protonated State

Júlia Viladoms, Lincoln G. Scott, and Martha J. Fedor

## SUPPLEMENTARY FIGURES

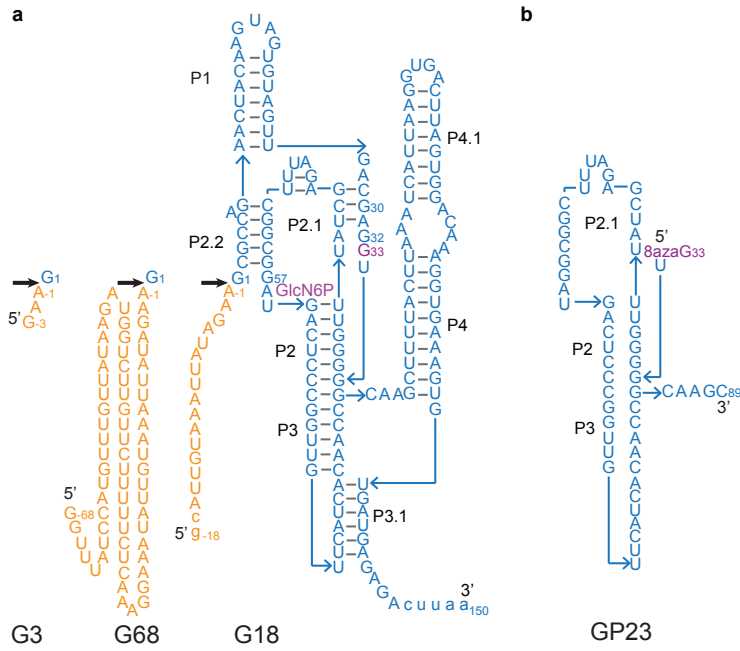

**Supplementary Figure S1.** RNAs used for kinetic and fluorescence experiments. **a)** G18 ribozyme used for kinetic studies, G68 ribozyme used to investigate ligation activity and G3 ribozyme used to evaluate product dissociation kinetics. **b)** GP23 is a 57 nt unstructured RNA used as a control for fluorescence studies.

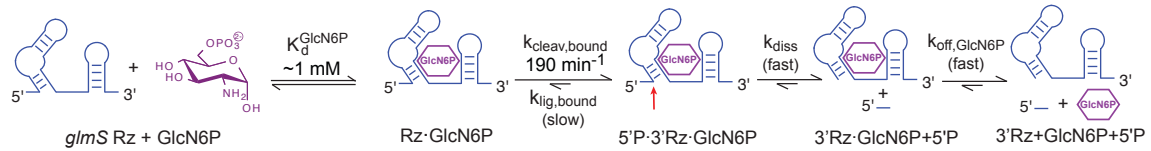

**Supplementary Figure S2.** Minimal kinetic mechanism of the *glmS* ribozyme reaction that includes binding of the cofactor GlcN6P, self-cleavage and product dissociation.

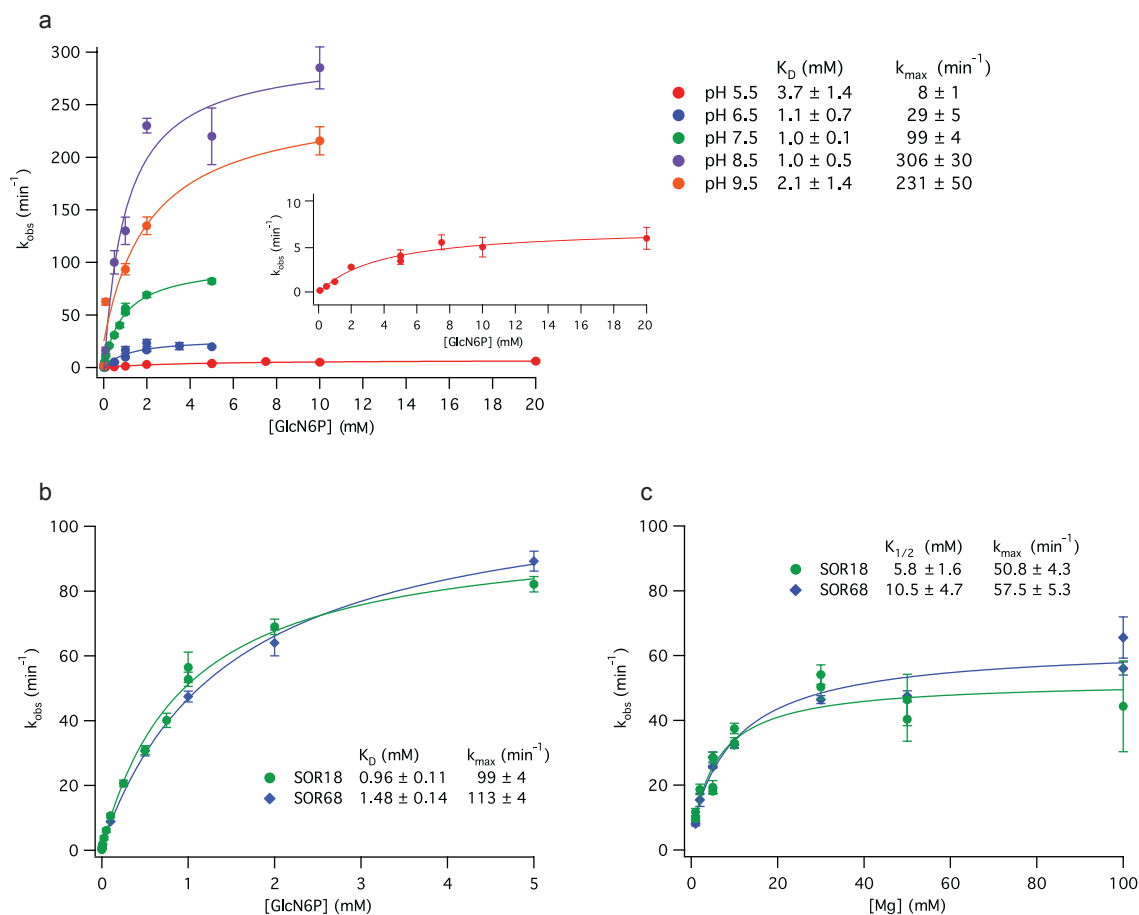

**Supplementary Figure S3.** *glmS* ribozyme affinity for GlcN6P and  $Mg^{2+}$ . **a)** GlcN6P concentration dependence of G18 binding at different pH values (50 mM buffer, 0.1 mM EDTA, 50 mM  $MgCl_2$ , 25 °C). **b)** Comparison of GlcN6P binding curves for G18 and G68 (50 mM HEPES pH 7.5, 0.1 mM EDTA, 50 mM  $MgCl_2$ , 25 °C). **c)** Comparison of the  $Mg^{2+}$  dependence of G18 and G68 cleavage kinetics (50 mM HEPES pH 7.5, 0.1 mM EDTA, 25 °C, 1 mM GlcN6P).

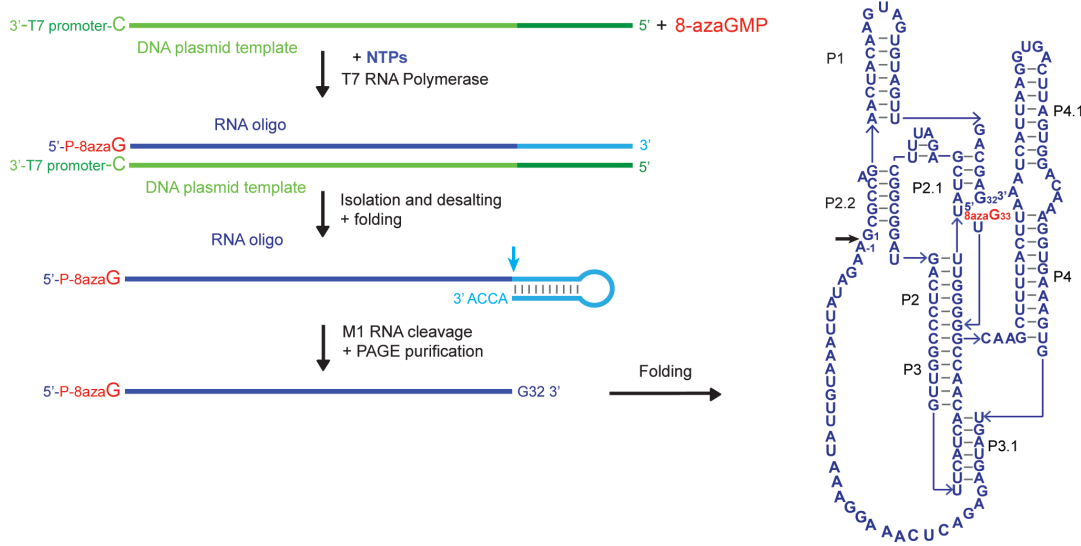

**Supplementary Figure S4.** Schematic representation of the strategy used to prepare the circular permuted G28c with GMP or 8azaGMP at the 5'-end and uniform 3'-terminus through M1 RNA processing.

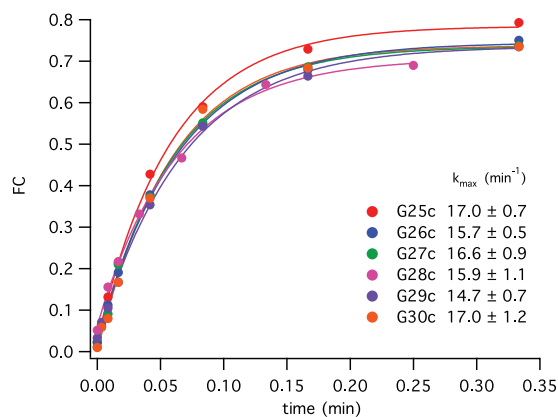

**Supplementary Figure S5.** Cleavage kinetics at pH 7.5 (50 mM HEPES, 0.1 mM EDTA, 50 mM MgCl<sub>2</sub>, 10 mM GlcN6P) for the *glmS* circular permutants with different chain lengths.

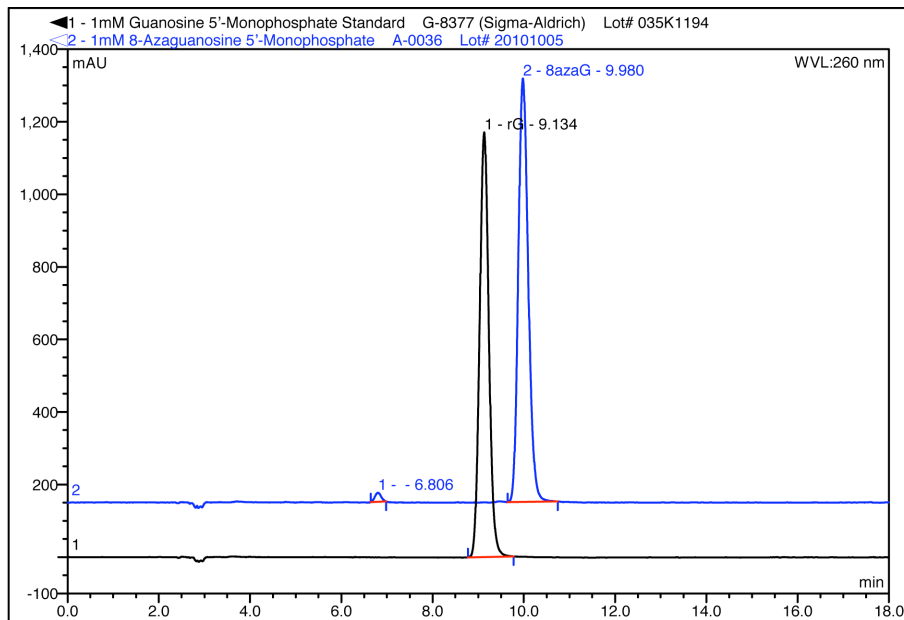

| No.           | Ret.Time<br>min | Peak Name | Height<br>mAU | Area<br>mAU*min | Rel.Area<br>% | Amount | Type               |
|---------------|-----------------|-----------|---------------|-----------------|---------------|--------|--------------------|
| 1             | 6.81            |           | 22.058        | 3.556           | 1.34          | n.a.   | BMB <sup>+</sup> ^ |
| 2             | 9.98            | 8azaG     | 1037.775      | 261.834         | 98.66         | n.a.   | BMB <sup>+</sup> ^ |
| <b>Total:</b> |                 |           | 1059.833      | 265.389         | 100.00        | 0.000  |                    |

  

| No.           | Ret.Time<br>min | Peak Name | Height<br>mAU | Area<br>mAU*min | Rel.Area<br>% | Amount | Type               |
|---------------|-----------------|-----------|---------------|-----------------|---------------|--------|--------------------|
| 1             | 9.13            | rG        | 1170.297      | 275.165         | 100.00        | n.a.   | BMB <sup>+</sup> ^ |
| <b>Total:</b> |                 |           | 1170.297      | 275.165         | 100.00        | 0.000  |                    |

**Supplementary Figure S6.** HPLC analysis of 8-Azaguanosine 5'-Monophosphate. Quality control reversed phase HPLC chromatogram. Column: Higgins HAISIL 100 C18. Conditions: 83.3 mM Triethylammonium Phosphate, 10% Methanol (v/v), pH 6.0 (w/ Phosphoric Acid). Isocratic, 30 min. UV detection at 260 nm. T = 20 °C.<sup>1</sup>

**a**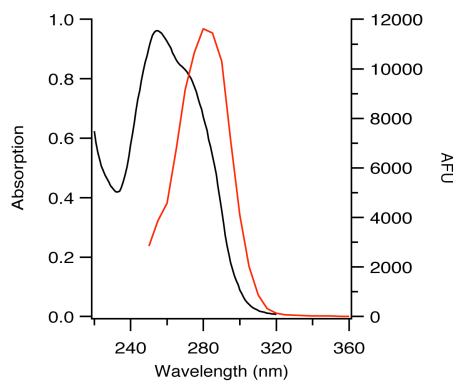**b**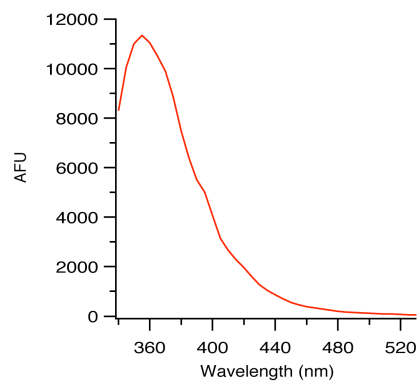**c**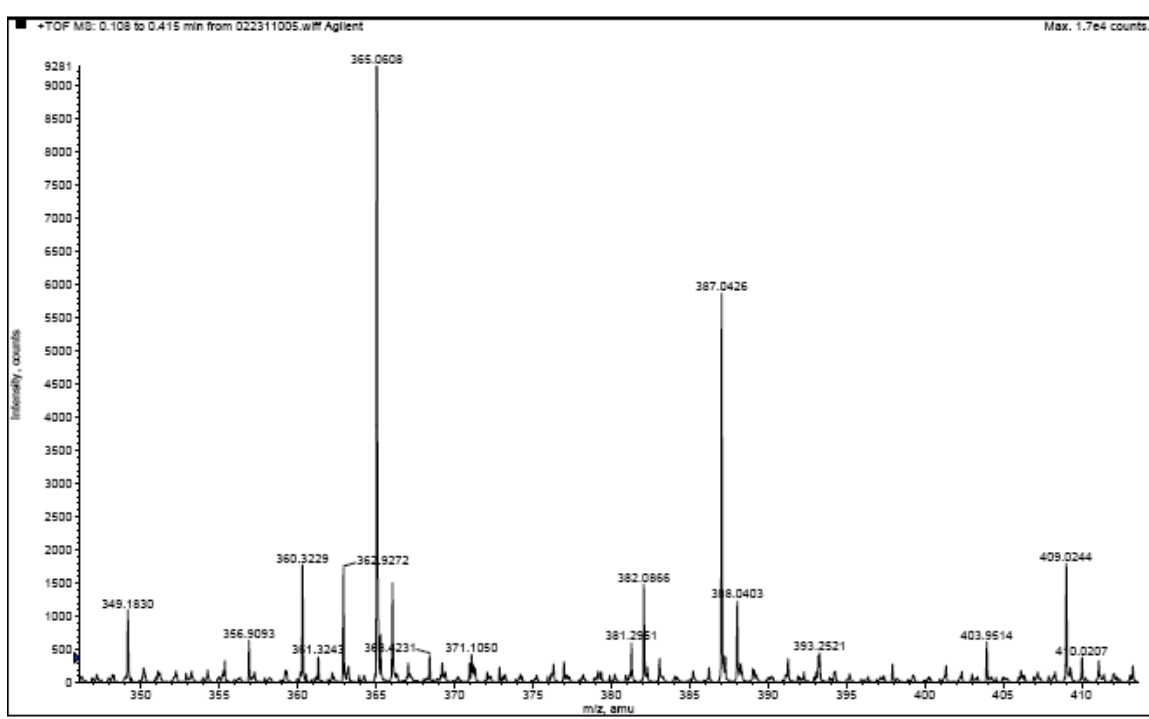

**Supplementary Figure S7.** UV and MS analysis of 8-Azaguanosine 5'-Monophosphate. **a)** 1mM 8azaGMP pH 7.6 UV spectrum (black) and excitation spectrum (red). **b)** 1mM 8azaGMP pH 7.6 emission spectrum. **b)** HRMS (ESI(+)-TOF) of 8azaGMP showing  $[M+H]^+$  (365.0608) and  $[M+Na]^+$  (387.0426).

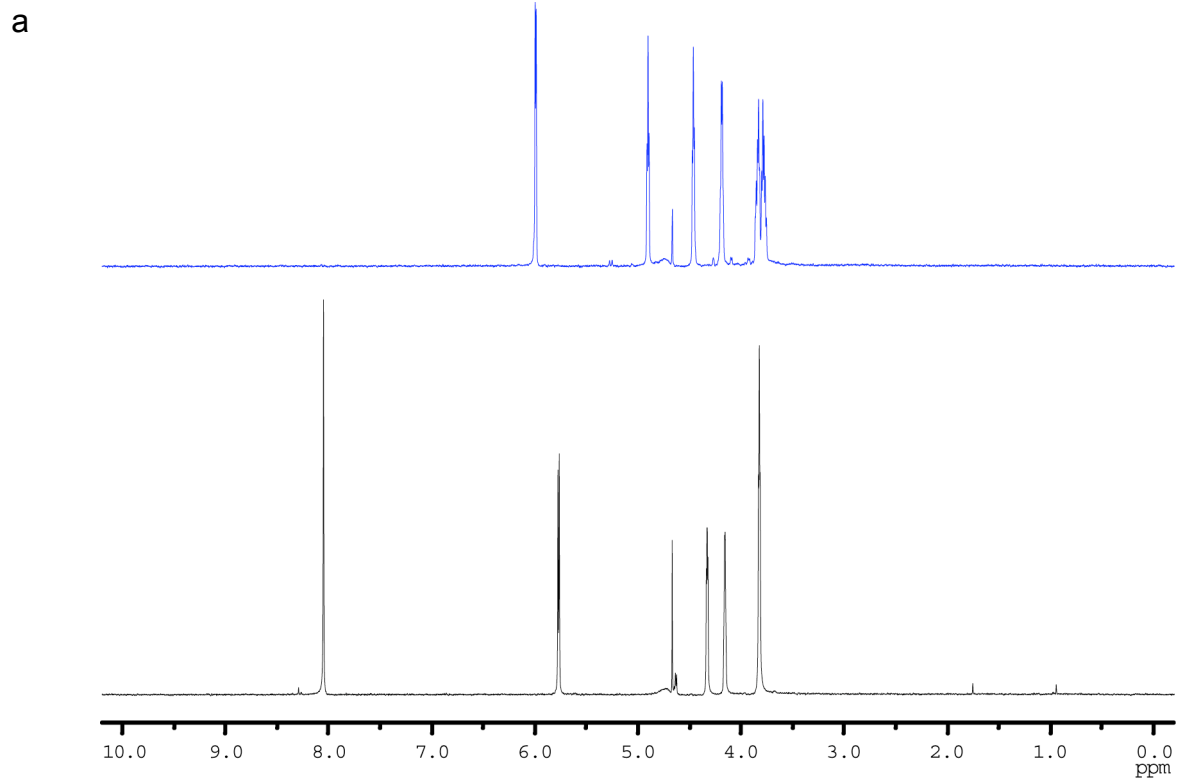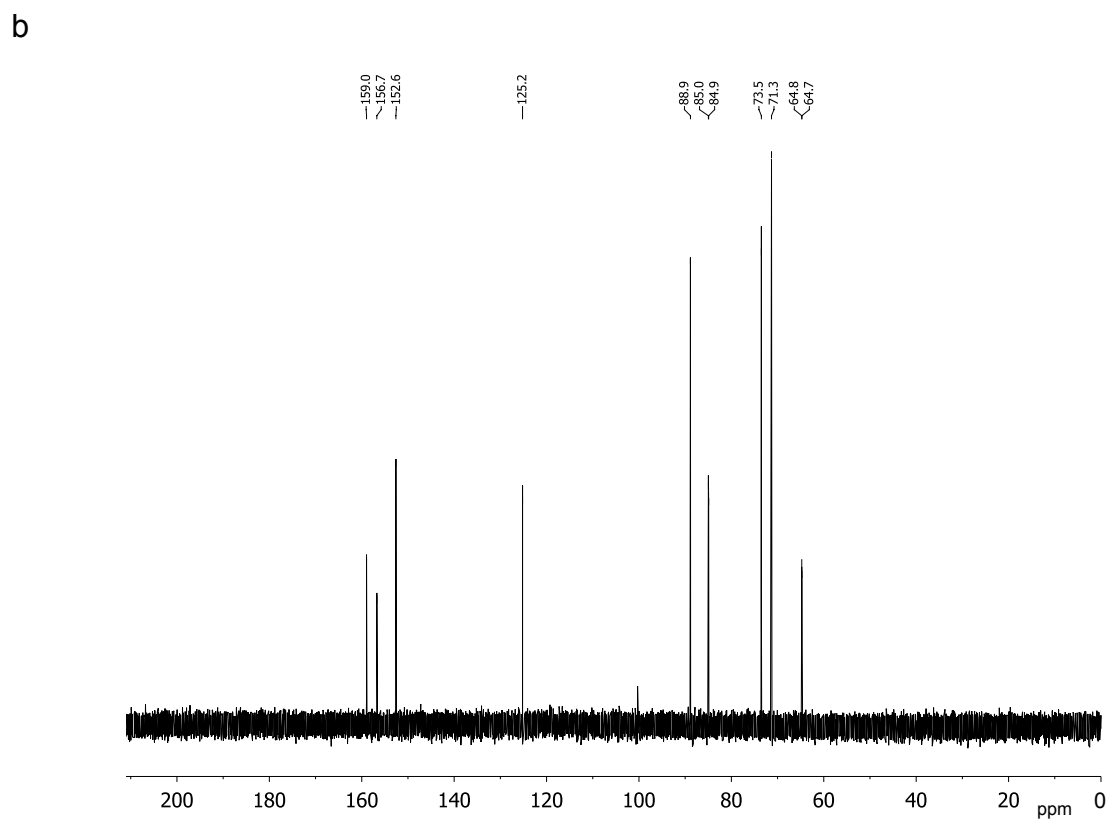

**Supplementary Figure S8.** NMR characterization of 8-azaguanosine 5'-monophosphate. **a)**  $^1\text{H}$ -NMR spectra ( $\text{D}_2\text{O}$ ) of 5 mM 8azaGMP (top) and guanosine 5'-monophosphate (bottom). **b)**  $^{13}\text{C}$  NMR spectrum ( $\text{D}_2\text{O}$ ) of 10 mM 8azaGMP.

### **SUPPLEMENTARY REFERENCES**

(1) Batey, R. T.; Battiste, J. L.; Williamson, J. R. In *Methods in Enzymology*; Thomas, L. J., Ed.; Academic Press: 1995; Vol. Volume 261, p 300.
